# Supplementary material for: A highly distorted HgS4 tetrahedron-induced moderate second-harmonic generation response of EuHgGeS4
Source: Royal Society of Chemistry journal article supplement (doi:10.1039/d0qi00266f), 2020-01-01
Supplement: d0qi00266f1.pdf [file d0qi00266f1.pdf]

## Supporting Information

### Highly distorted HgS<sub>4</sub> tetrahedra induced moderate second-harmonic generation response of EuHgGeS<sub>4</sub>

Mei Yan,<sup>a</sup> Zong-Dong Sun,<sup>a</sup> Wen-Dong Yao,<sup>a</sup> Wenfeng Zhou,<sup>a</sup> Wenlong Liu,<sup>a\*</sup> and Sheng-Ping Guo<sup>a\*</sup>

*School of Chemistry and Chemical Engineering, Yangzhou University, Yangzhou, Jiangsu 225002, P. R. China*

**Table S1.** Atomic coordinates ( $\times 10^4$ ) and equivalent isotropic displacement parameters ( $U_{\text{eq}}^a$ ,  $\text{\AA}^2 \times 10^3$ ) for **1**.

| atom  | <i>x</i> | <i>y</i>   | <i>z</i>   | $U_{\text{eq}}/\text{\AA}^2$ |
|-------|----------|------------|------------|------------------------------|
| Eu(1) | 5000     | 5000       | 3218.4(13) | 11.5(3)                      |
| Hg(1) | 7500     | 3290.2(6)  | 8716.9(18) | 45.5(4)                      |
| Ge(1) | 7500     | 2158.1(15) | 3365(3)    | 9.4(3)                       |
| S(1)  | 5791(3)  | 2276(3)    | 1271(5)    | 10.7(5)                      |
| S(2)  | 7500     | 4043(3)    | 5163(5)    | 8.7(7)                       |
| S(3)  | 7500     | 629(4)     | 5734(6)    | 13.2(8)                      |

<sup>a</sup> $U_{\text{eq}}$  is defined as one third of the trace of the orthogonalized  $U_{ij}$  tensor.

**Table S2.** Eu-based quaternary chalcogenides.

| Compounds                                        | Space group                              | Band gap (eV) | SHG intensity | Phase matchability | Reference |
|--------------------------------------------------|------------------------------------------|---------------|---------------|--------------------|-----------|
| Cu <sub>2</sub> EuSiS <sub>4</sub>               | <i>P</i> 3 <sub>1</sub> 21               | 2.36          | -             | no                 | 1         |
| Cu <sub>2</sub> EuGeS <sub>4</sub>               | <i>P</i> 3 <sub>2</sub> 21               | 2.32          | -             | no                 | 1         |
| Cu <sub>2</sub> EuGeSe <sub>4</sub>              | <i>Ama</i> 2                             | 1.74          | -             | no                 | 1         |
| EuCdGeS <sub>4</sub>                             | <i>Ama</i> 2                             | 2.50          | 2.6 × AGS     | yes                | 2         |
| EuCdGeSe <sub>4</sub>                            | <i>Ama</i> 2                             | 2.25          | 3.8 × AGS     | yes                | 2         |
| EuZnGeS <sub>4</sub>                             | <i>Fdd</i> 2                             | 2.26          | -             | -                  | 3         |
| Eu <sub>2</sub> Ga <sub>2</sub> GeS <sub>7</sub> | <i>P</i> $\bar{4}$ <sub>2</sub> <i>m</i> | 1.70          | 1.6 × AGS     | yes                | 4         |
| EuCu <sub>2</sub> GeS <sub>4</sub>               | <i>P</i> 3 <sub>1</sub> 21               | 1.57          | -             | -                  | 5         |
| EuCu <sub>2</sub> SnS <sub>4</sub>               | <i>P</i> 3 <sub>1</sub> 21               | 2.22          | -             | -                  | 5         |

1 Z. D. Sun, Y. Chi and S. P. Guo, *J. Solid. State. Chem.*, 2019, **269**, 225–232.

2 W. H. Xing, N. Z. Wang, Y. W. Guo, Z. Li, J. Tang, K. J. Kang, W. L. Yin, Z. S. Lin, J. Y. Yao, and B. Kang, *Dalton Trans.*, 2019, **48**, 17620–17625.

3 Y. Chi, S. P. Guo and H. X. Xue, *RSC Adv.*, 2017, **7**, 5039–5045.

4 M. C. Chen, P. Li, L. J. Zhou, L. H. Li and L. Chen, *Inorg. Chem.*, 2011, **50**, 12402–12404.

5 J. Llanos, C. Mujica, V. Sánchez and O. Peña, *J. Solid. State. Chem.*, 2003, **173**, 78–82.
